# Supplementary material for: Engineered Graphene Quantum Dots as a Magnetic Resonance Signal Amplifier for Biomedical Imaging
Source: MDPI journal article supplement (doi:10.3390/molecules28052363), 2023-03-03
Supplement: s1 [file s1]

# Engineered Graphene Quantum Dots as a Magnetic Resonance Signal Amplifier for Biomedical Imaging

Zhongtao Li <sup>1</sup>, Guiqiang Qi <sup>1</sup>, Guangyue Shi <sup>1</sup>, Meng Zhang <sup>2</sup>, Haifeng Hu <sup>3</sup> and Liguao Hao <sup>1,\*</sup>

<sup>1</sup> Department of Molecular Imaging, School of Medical Technology, Qiqihar Medical University, Qiqihar 161006, China

<sup>2</sup> Animal Laboratory Center, Qiqihar Medical University, Qiqihar 161006, China

<sup>3</sup> Department of MRI, The Second Affiliated Hospital of Qiqihar Medical University, Qiqihar 161006, China

\* Correspondence: haoliguo@qmu.edu.cn

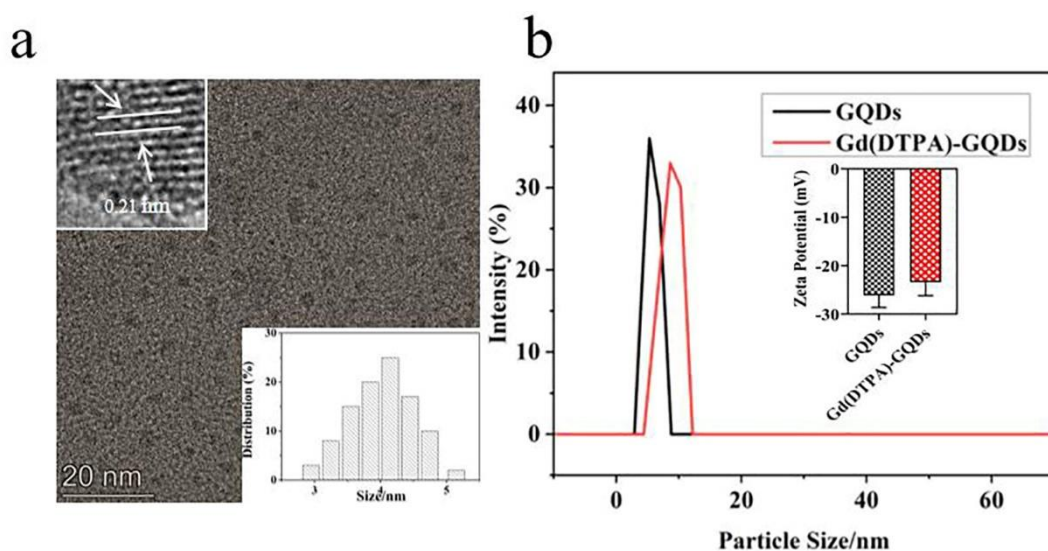

**Figure S1.** Structural characterization: (a) TEM image and size distribution of Gd(DTPA)-GQDs sample (Inset is the HR-TEM of Gd(DTPA)-GQDs). (b) Hydrodynamic diameters and zeta potentials of GQDs and Gd(DTPA)-GQDs.

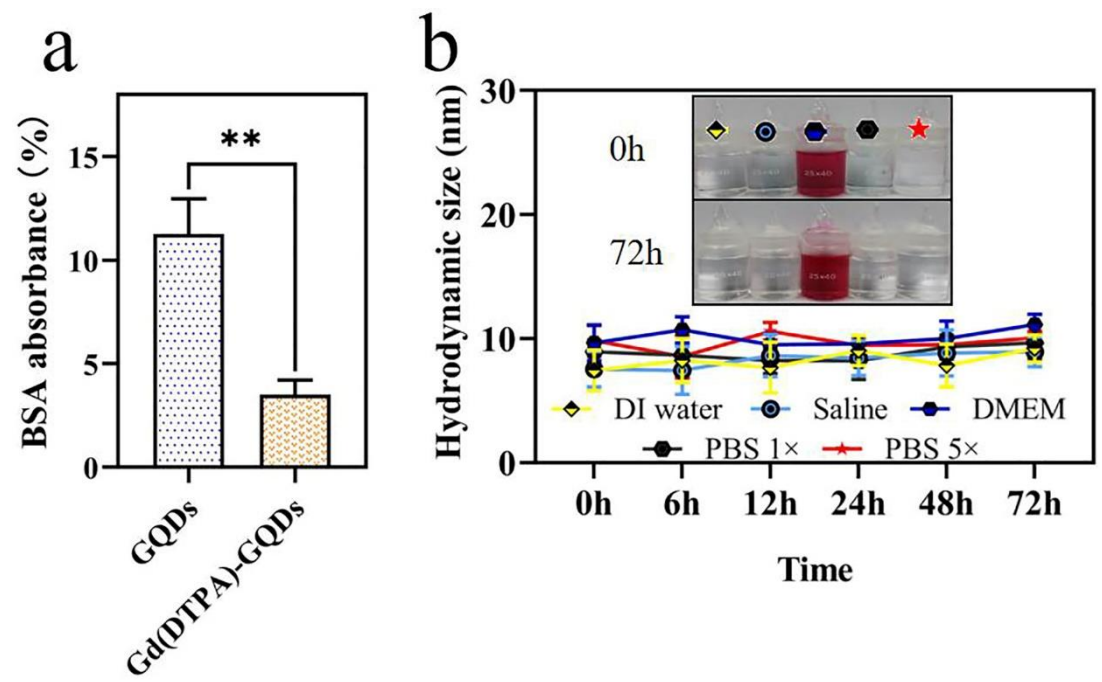

**Figure S2.** (a) BSA adsorbance amounts of GQDs and Gd(DTPA)-GQDs ( $n = 3$ ,  $**p < 0.01$ ). (b) Stability of Gd(DTPA)-GQDs nanocomposites in different biological solutions (Inset is digital photographs of Gd(DTPA)-GQDs in several solutions such as DI water, saline, DMEM, PBS 1×, and PBS 5×).

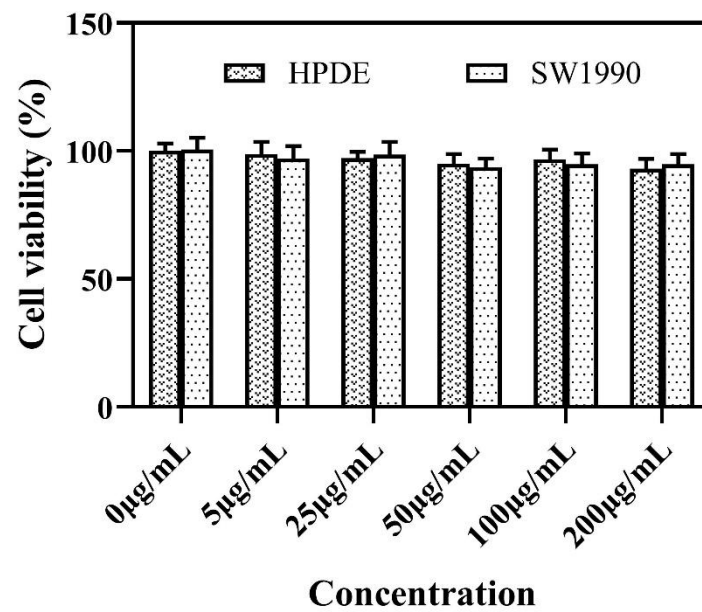

**Figure S3.** Cytotoxicity against HPDE cells and SW1990 cells after incubation with different concentrations of various GQDs for 24 h.

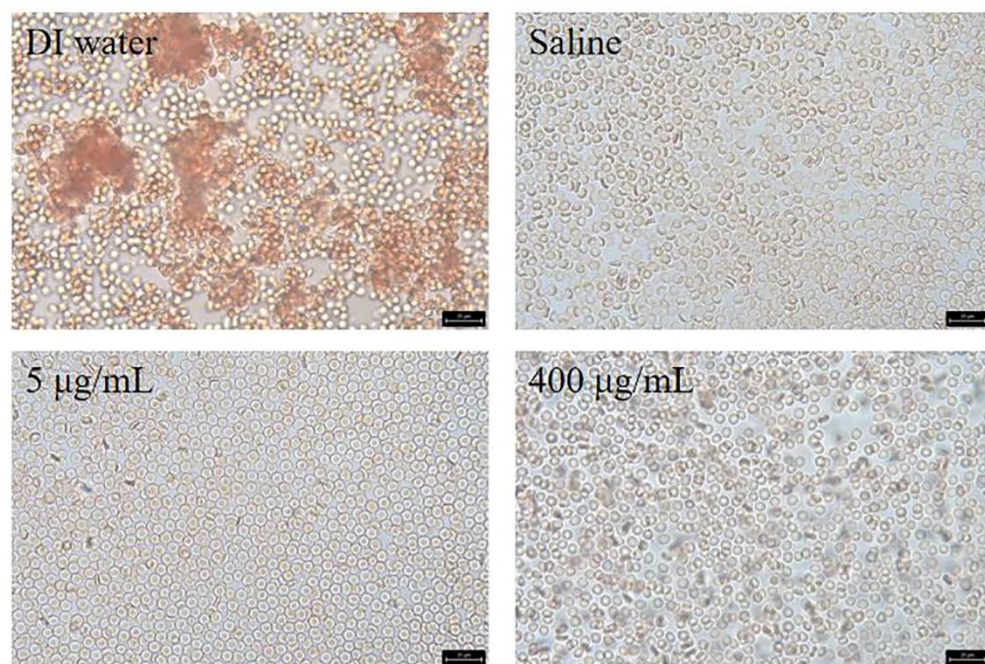

**Figure S4.** Morphology of human red blood cells upon treatment with saline, DI water and Gd(DTPA)-GQDs (5, 400  $\mu\text{g/mL}$ ) for 4 h.

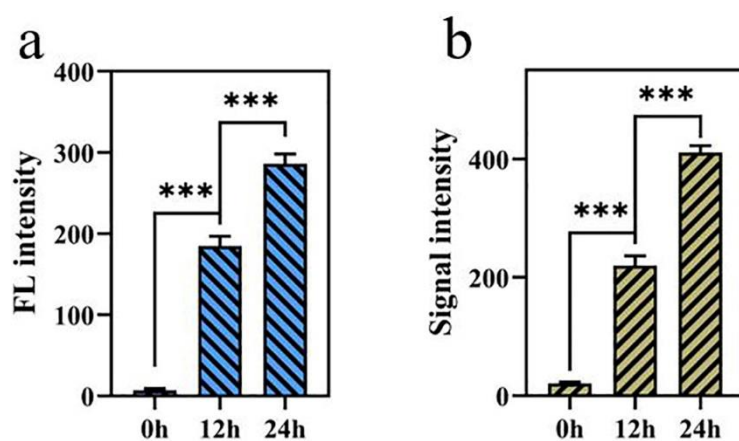

**Figure S5.** Mean fluorescence intensity (a) and MRI signal intensity (b) of SW1990 cells after incubation with Gd(DTPA)-GQDs at different times. (\*\*\*)  $p < 0.001$ .
